# Supplementary material for: Air Passenger Travel and International Surveillance Data Predict Spatiotemporal Variation in Measles Importations to the United States
Source: MDPI journal article supplement (doi:10.3390/pathogens10020155), 2021-02-03
Supplement: s1 [file s1]

## Supplement

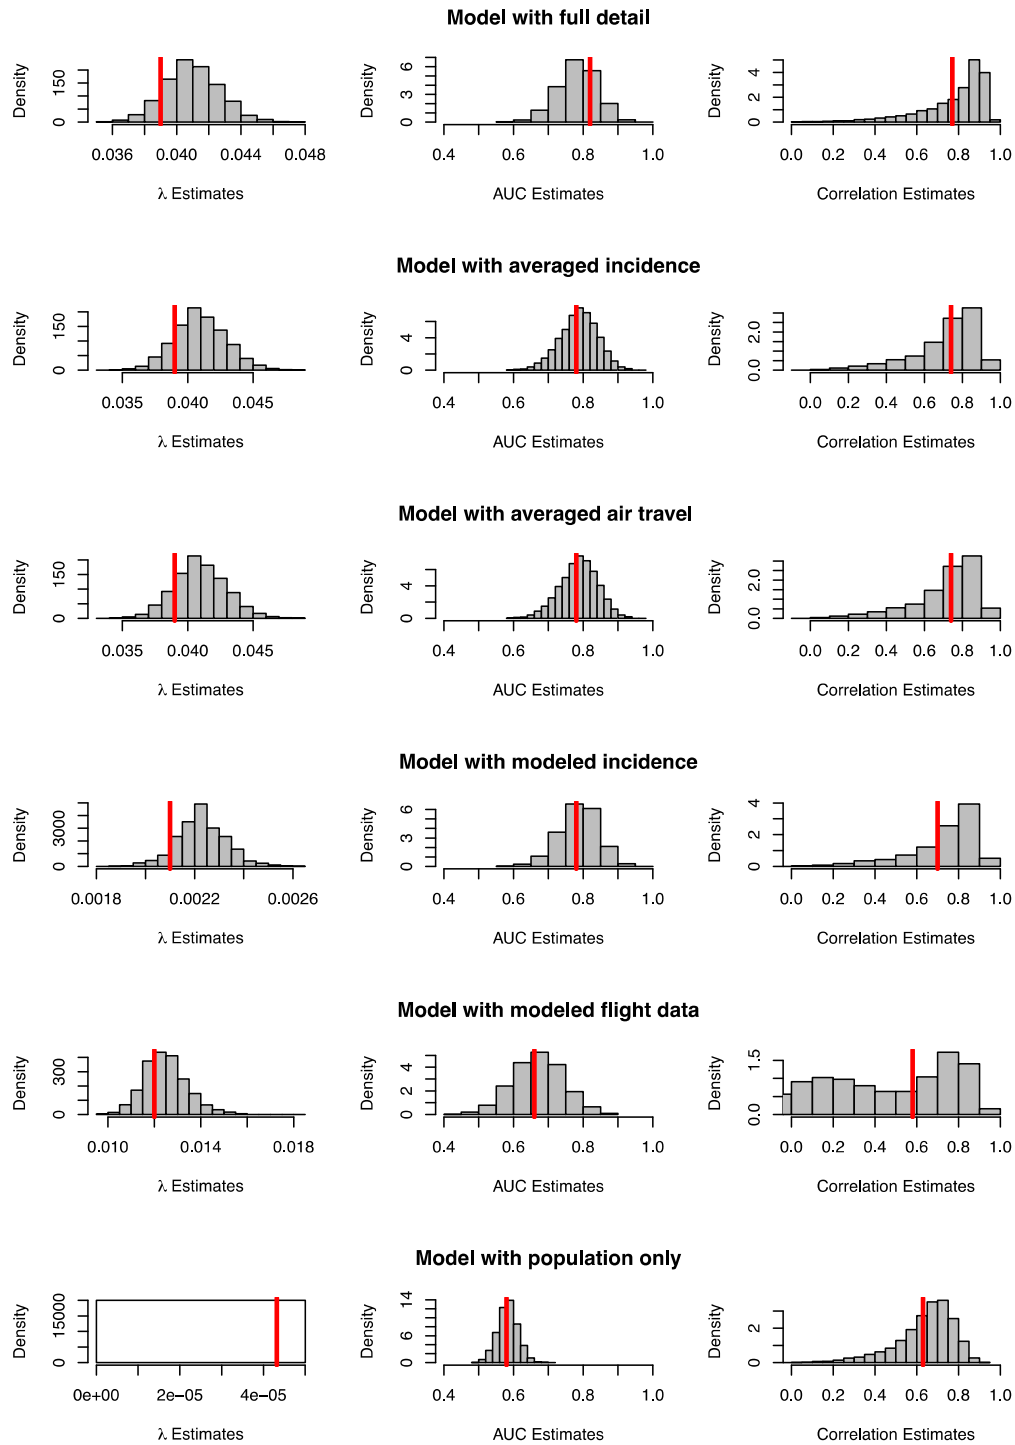

**Figure S1.** Histograms of partial fit model statistics. Values generated when each model was fit to the complete dataset are shown in red. The null model's resampling process consistently generated identical  $\lambda$ , likely a result of the large population values in question, and as a result no histogram is shown.
